# Supplementary material for: Pim Kinases Promote Migration and Metastatic Growth of Prostate Cancer Xenografts
Source: PLoS One. 2015 Jun 15;10(6):e0130340. doi: 10.1371/journal.pone.0130340 (PMC4467846; doi:10.1371/journal.pone.0130340)
Supplement: S2 Table — List of mice with or without prostate xenograft tumors derived from the stable PC-3 cell lines in the presence of control (DMSO or DMA) or Pim inhibitor treatments. (XLSX) [file pone.0130340.s010.xlsx]

## Sheet: TableS2
S2 Table.	Animal numbers in the orthotopic experiments.
Experiment	Stable PC-3 cell line	Treatment	Animals
			Tumor	No tumor	Total
Orthotopic 1 (preliminary)	Mock	-	1	-	1
	Pim-3	-	3	3	6
Orthotopic 2	Mock	DMSO	1	3	4
		DMA	5	-	5
	Pim-1	-	4	-	4
	Pim-3	DMSO	3	2	5
		DMA	5	3	8
		DHPCC-9	7	3	10
		BA-1a	3	3	6
