# Supplementary material for: Pim Kinases Promote Migration and Metastatic Growth of Prostate Cancer Xenografts
Source: PLoS One. 2015 Jun 15;10(6):e0130340. doi: 10.1371/journal.pone.0130340 (PMC4467846; doi:10.1371/journal.pone.0130340)
Supplement: S4 Table — Immunohistochemical staining of paraffin-embedded tissue samples was done according to following protocols for antigen retrieval (1), blocking (2), primary (3) and secondary antibody stainings (4), Avidin-Biotin reaction (5) and DAB reaction (6). (XLSX) [file pone.0130340.s012.xlsx]

## Sheet: Taul1
Table S4.	Protocols for immunohistochemistry.
Target	Step	Protocol
Mitotic cells	1	10 mM natrium citrate buffer, pH 6, 750 W, 10 min
	2	normal goat serum, S-1000 Vector, 2 %/ PBS, RT, 30 min
	3	rabbit polyclonal, Phospho-Histone H3, #9701 Cell Signaling Technology, 1:200/PBS, 4 oC, o/n
	4	goat anti-rabbit IgG, BA-1000 Vector, 1:200/ PBS, RT, 1 h
	5	PK-4000 Vector kit , RT, 1h
	6	SK-4100 Vector kit , RT, 5 min
V5-tag	1	0.1 M Tris-HCl + 2 mM EDTA, pH 9.0, 750 W, 10 min
	2	Normal horse serum, S-2000 Vector, 10%/ TBS, RT, 2 h
	3	goat polyclonal, V5, ab95038 Abcam, 1:500/ TBS, RT, 2 h
	4	horse anti-goat IgG, BA-9500 Vector, 1:200/ TBS, RT, 1 h
	5	PK-4000 Vector kit , RT, 30 min
	6	SK-4100 Vector kit , RT, 15 min
Blood vessels	1	10 mM natrium citrate buffer, pH 6, 750 W, 15 min
	2	normal rabbit serum, S-5000 Vector, 10 %/ PBS, RT, 2h
	3	rat monoclonal, CD34, ME 14.7, sc-18917 Santa Cruz, 1:50/ PBS, 4 oC, o/n
	4	rabbit anti-rat, DAKO 097(101)E0468, 1:200/ PBS, RT 1 h
	5	PK-4000 Vector kit , RT, 1 h
	6	SK-4100 Vector kit , RT, 15 min
Lymphatic vessels	1	0.1 M Tris-HCl + 2 mM EDTA, pH 9.0, 750 W, 10 min
	2	normal goat serum, S-1000 Vector, 25 %/ 5 % BSA/ PBS, RT, 30 min
	2	Avidin (A), RT, 10 min - Biotin (B), RT, 10 min blocking, 00-4304 Zymed
	3	rabbit polyclonal, m-LYVE-1 (Dr. Jackson, WIMM, Oxford, UK), 1:200/ blocking buffer, RT, 2.5 h
	4	goat anti-rabbit IgG, BA-1000 Vector, 1:200/ blocking buffer, RT, 1 h
	5	PK-4000 Vector kit , RT, 30 min
	6	SK-4100 Vector kit , RT, 10 min
Phosphor-ylated CXCR4 (S339)	1	10 mM natrium citrate buffer, pH 6, 750 W, 20 min
	2	normal goat serum, S-1000 Vector, 10 %/ PBS, RT, 2 h
	3	rabbit polyclonal, CXCR4 phospho S339, ab74012 Abcam, 1:500/ PBS, 4 oC, o/n
	4	goat anti-rabbit IgG, BA-1000 Vector, 1:200/ PBS, RT, 1 h
	5	PK-4000 Vector kit , RT, 30 min
	6	SK-4100 Vector kit , RT, 15 min
CXCR4	1	10 mM natrium citrate buffer, pH 6, 750W, 20 min
	2	normal goat serum, S-1000 Vector, 10 %/ PBS, RT, 2 h
	3	rabbit polyclonal, CXCR4, ab2074 Abcam, 1:200/ PBS, 4 oC, o/n
	4	goat anti-rabbit IgG, BA-1000 Vector, 1:200/ PBS, RT, 1 h
	5	PK-4000 Vector kit , RT, 30 min
	6	SK-4100 Vector kit , RT, 15 min
