# Supplementary material for: Pim Kinases Promote Migration and Metastatic Growth of Prostate Cancer Xenografts
Source: PLoS One. 2015 Jun 15;10(6):e0130340. doi: 10.1371/journal.pone.0130340 (PMC4467846; doi:10.1371/journal.pone.0130340)
Supplement: S6 Table — Table contains details for primary antibody dilutions incubated at +4°C overnight. (XLSX) [file pone.0130340.s014.xlsx]

## Sheet: Taul1
S6 Table.	Antibody dilutions for Western blotting.
Antibody	Product number	Species/ details	Dilution
anti-phospho (Ser339)-CXCR4	ab74012, Abcam	rabbit polyclonal	1:1000
anti-CXCR4	ab2074, Abcam	rabbit polyclonal	1:1000
anti-Pim-1	12H8; Santa Cruz	mouse monoclonal	1:500
anti-Pim-2	D1D2; Cell Signaling Technology	rabbit monoclonal	1:1000
anti-Pim-3	D17C9; Cell Signaling Technology	rabbit monoclonal	1:1000
anti-ß-actin	13E5, #4970S, Cell Signaling Technology	rabbit monoclonal	1:1000
anti-GAPDH	G8795, Sigma-Aldrich	mouse monoclonal	1:20 000
